# Supplementary material for: Atmospheric bromoform at Cape Point, South Africa: an initial fixed-point data set on the African continent
Source: Copernicus journal article supplement (doi:10.5194/acp-18-5785-2018), 2018-04-25
Supplement: Supplementary file 1 [file acp-18-5785-2018-supplement.zip]

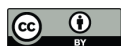

*Supplement of*

## **Atmospheric bromoform at Cape Point, South Africa: an initial fixed-point data set on the African continent**

**Brett Kuyper et al.**

*Correspondence to:* Brett Kuyper (3479857@myuwc.ac.za)

- [acp-18-5785-2018-supplement-title-page.pdf](#)
- [Calibration Calculation Steps and Method.pdf](#)
- [Calibration\\_data\\_171117.xlsx](#)

The copyright of individual parts of the supplement might differ from the CC BY 3.0 License.
